# Supplementary material for: MIL-47(v)-derived carbon-doped vanadium oxide for selective oxidation of 5-hydroxymethylfurfural to 2,5-diformylfuran
Source: Royal Society of Chemistry journal article supplement (doi:10.1039/d2dt03338k), 2022-01-01
Supplement: d2dt03338k1.pdf [file d2dt03338k1.pdf]

## Supporting information

### **MIL-47(V)-Derived Carbon-doped Vanadium Oxide for Selective Oxidation of 5-Hydroxymethylfurfural to 2,5-Diformylfuran**

Yan Zhou,<sup>a</sup> Shanshan Lv,<sup>a</sup> Han Li,<sup>a</sup> Qikang Wu,<sup>a</sup> Taiyu Chen,<sup>a</sup> Shaohuan Liu,<sup>a</sup>  
Wanying Li,<sup>a</sup> Wenjuan Yang <sup>b\*</sup> and Zheng Chen <sup>a\*</sup>

<sup>a</sup> *Key Laboratory of Functional Molecular Solids, Ministry of Education, Anhui  
Key Laboratory of Molecule-Based Materials, College of Chemistry and  
Materials Science, Anhui Normal University, Wuhu, 241002, China.*

<sup>b</sup> *Julong College, Shenzhen Technology University, Shenzhen, 518118, China*

**Theoretical results:** Calculations were performed using spin-polarized Kohn-Sham density functional theory (DFT). We used the generalized gradient approximation with the Perdew-Burke-Ernzerhof<sup>1</sup> exchange-correlation functional as implemented in the Vienna *ab initio* simulation package (VASP).<sup>2,3</sup> The valence orbitals of V (3d, 4s), O (2s, 2p) and C (2s, 2p) were described by plane-wave basis sets with cutoff energies of 400 eV. The Gaussian smearing method with a width of 0.20 eV was used. According to the experimental characterization results, a unit cell of V<sub>2</sub>O<sub>5</sub> with a space group of Pmmn was used to model the catalyst structure. Bulk optimization yielded lattice parameters of a = 3.56 Å, b = 11.51 Å, c = 4.36 Å, which were in good agreement with the experimental values. The Brillouin zone was sampled at (2 × 2 × 1) and the  $\Gamma$ -point for the calculations. The convergence criteria for the energy and force were set to 10<sup>-4</sup> eV and 0.03 eV/Å. The oxygen vacancy formation energies were calculated according to the equation,  $E_f(\text{Vo}) = E(\text{defect}) - (E_{\text{V}_2\text{O}_5} - \mu_{\text{O}})$ ,  $\mu_{\text{O}} = 1/2 E(\text{O}_2, \text{g})$ .

- (1) Perdew, J. P.; Burke, K.; Ernzerhof, M. Phys. Rev. Lett. 1996, 77, 3865.
- (2) Kresse, G.; Furthmüller, J. Physical Review B 1996, 54, 11169.
- (3) Kresse, G.; Furthmüller, J. Computational Materials Science 1996, 6, 15.

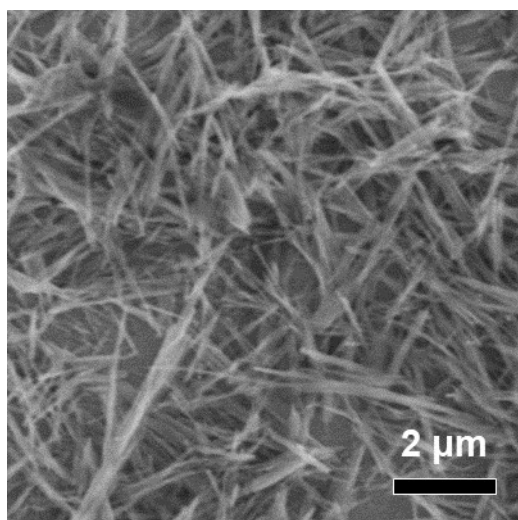

**Fig. S1.** SEM image of MIL-47 nanorods.

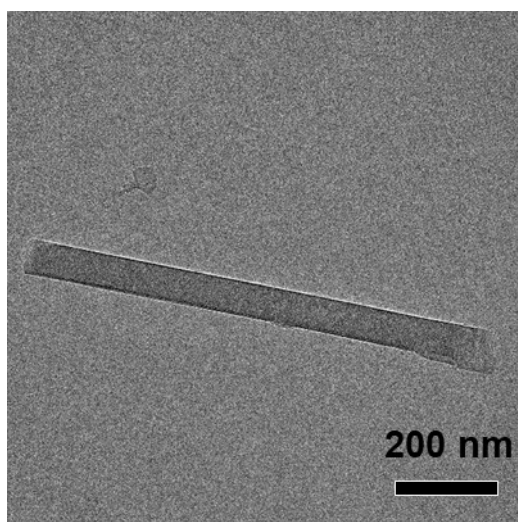

**Fig. S2.** HRTEM image of a single MIL-47 nanorod.

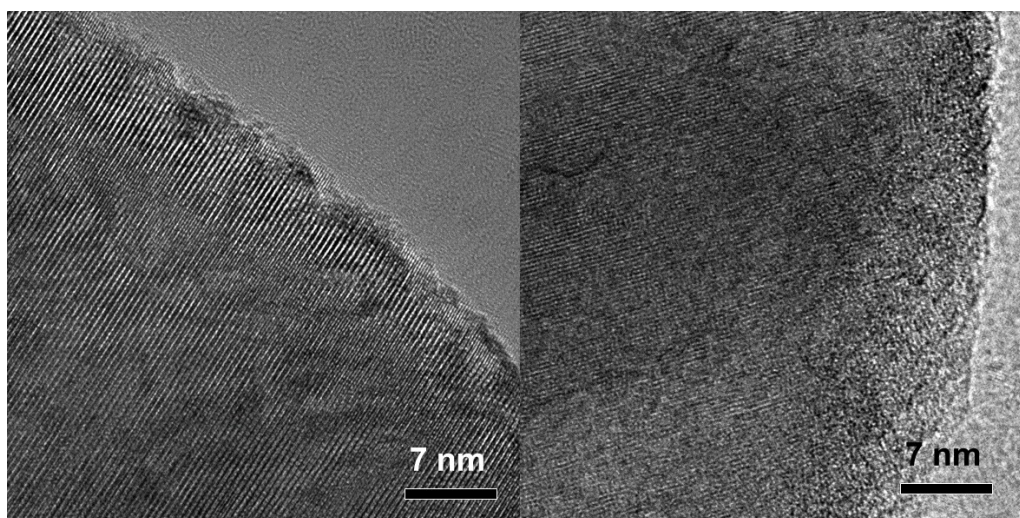

**Fig. S3.** HRTEM of C-V<sub>2</sub>O<sub>5</sub> at different areas.

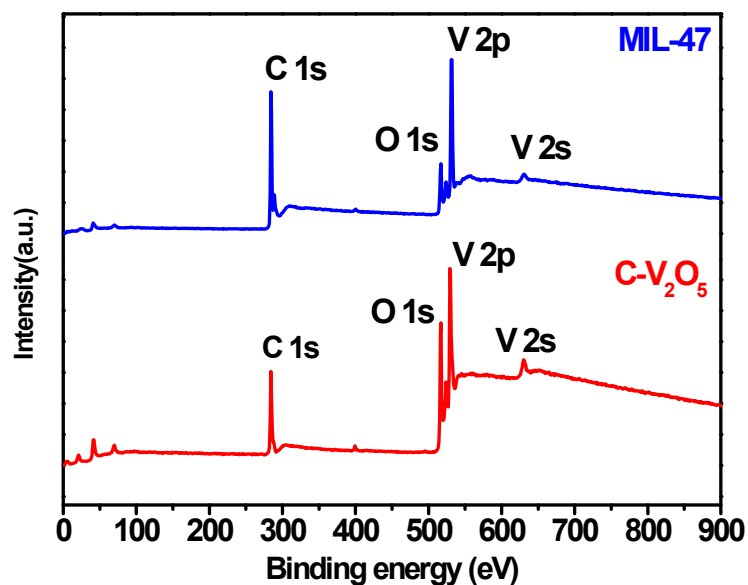

**Fig. S4.** The XPS spectra of MIL-47 and C-V<sub>2</sub>O<sub>5</sub>.

**Table S1.** The area fraction of different V species in MIL-47.

| Species         | Lines             | Position (eV) | Area fraction (%) |
|-----------------|-------------------|---------------|-------------------|
| V <sup>5+</sup> | 2p <sub>3/2</sub> | 517.4         | 34                |
|                 | 2p <sub>1/2</sub> | 524.8         | 17                |
| V <sup>4+</sup> | 2p <sub>3/2</sub> | 516.7         | 16                |
|                 | 2p <sub>1/2</sub> | 523.9         | 8                 |
| V <sup>3+</sup> | 2p <sub>3/2</sub> | 515.7         | 16                |
|                 | 2p <sub>1/2</sub> | 523.1         | 8                 |

**Table S2.** The area fraction of different V species in C-V<sub>2</sub>O<sub>5</sub>.

| Species         | Lines             | Position (eV) | Area fraction (%) |
|-----------------|-------------------|---------------|-------------------|
| V <sup>5+</sup> | 2p <sub>3/2</sub> | 517.4         | 53                |
|                 | 2p <sub>1/2</sub> | 524.8         | 16                |
| V <sup>4+</sup> | 2p <sub>3/2</sub> | 516.7         | 14                |
|                 | 2p <sub>1/2</sub> | 523.9         | 7                 |
| V <sup>3+</sup> | 2p <sub>3/2</sub> | 515.7         | 5                 |
|                 | 2p <sub>1/2</sub> | 523.1         | 3                 |

**Table S3.** The semi-quantitative analysis of XPS.

| Sample                          | Element | Atomic F. (%) |
|---------------------------------|---------|---------------|
| MIL-47                          | C       | 60.68         |
|                                 | O       | 26.04         |
|                                 | V       | 13.29         |
| C-V <sub>2</sub> O <sub>5</sub> | C       | 42.09         |
|                                 | O       | 35.56         |
|                                 | V       | 22.35         |

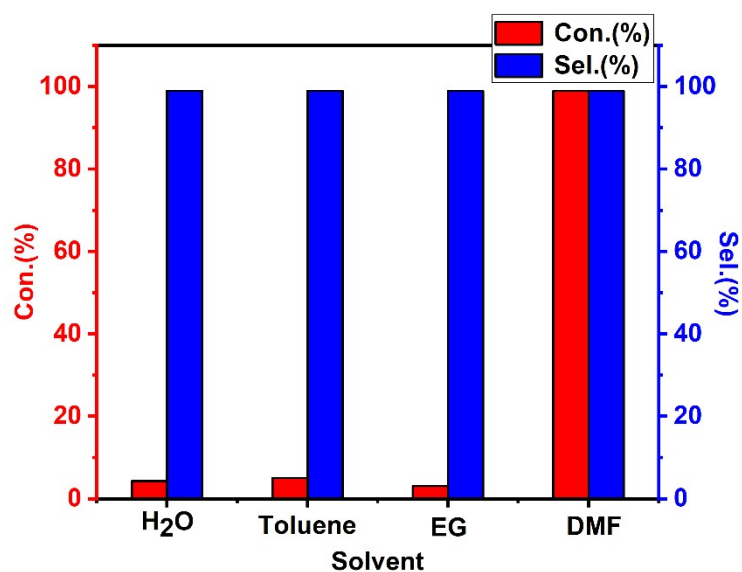

**Fig. S5.** Solvent screening of MIL-47 nanorods to HMF oxidation.

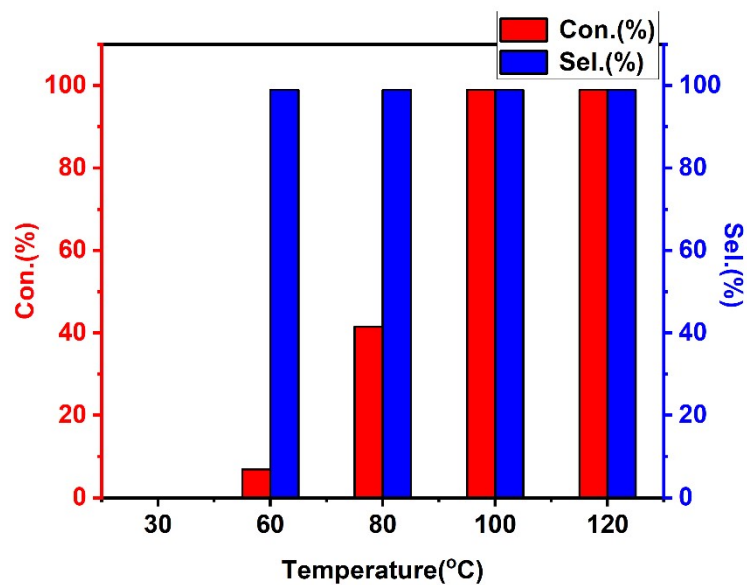

**Fig. S6.** The temperature-activity dependence using MIL-47 as the catalyst.

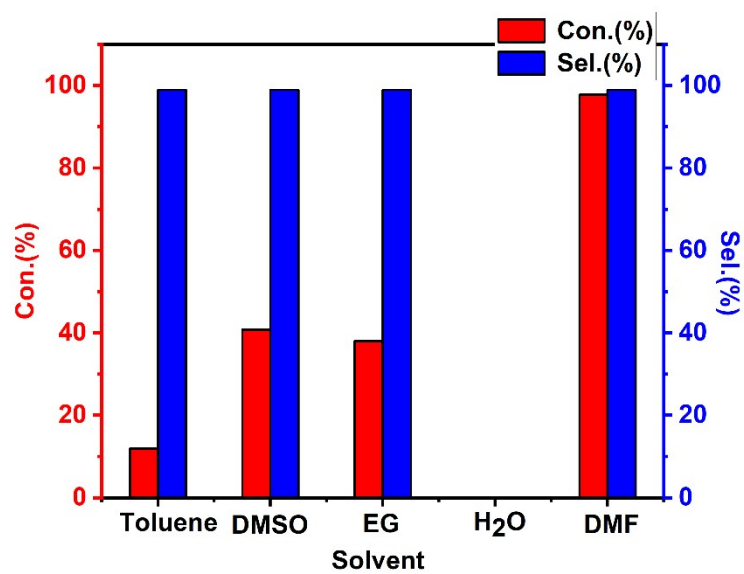

Fig. S7. Solvent screening of Carbon-V<sub>2</sub>O<sub>5</sub> to HMF oxidation.

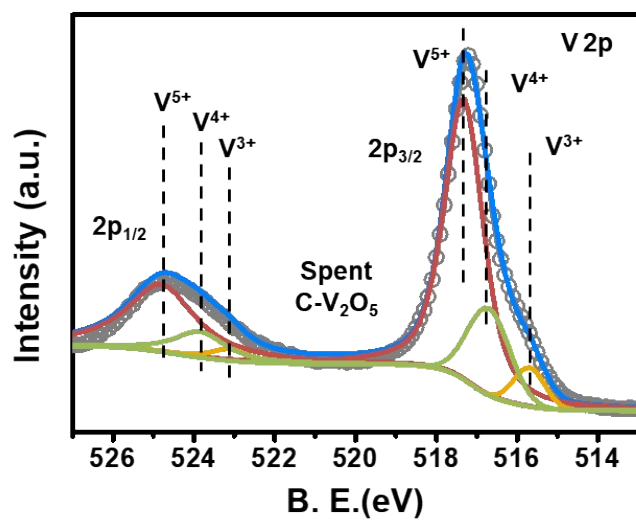

Fig. S8. The V 2p spectra of spent C-V<sub>2</sub>O<sub>5</sub> sample.

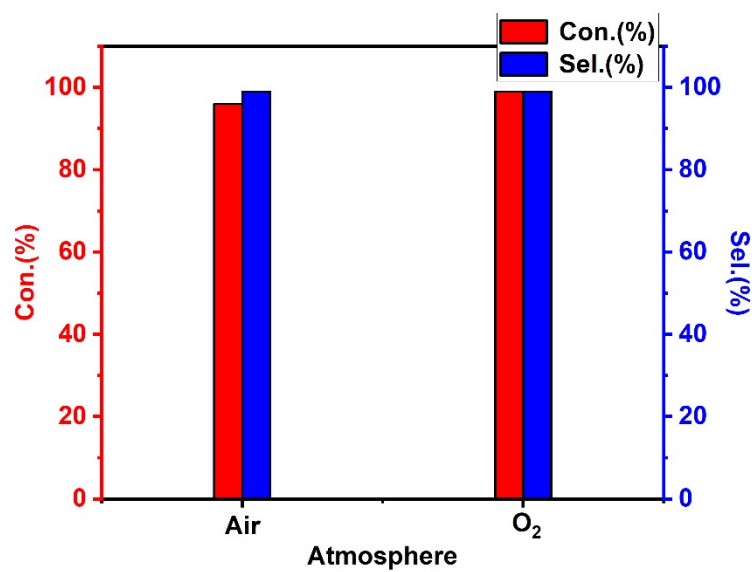

**Fig. S9.** The HMF oxidation is catalyzed by C-V<sub>2</sub>O<sub>5</sub> using air or oxygen gas as an oxidant.

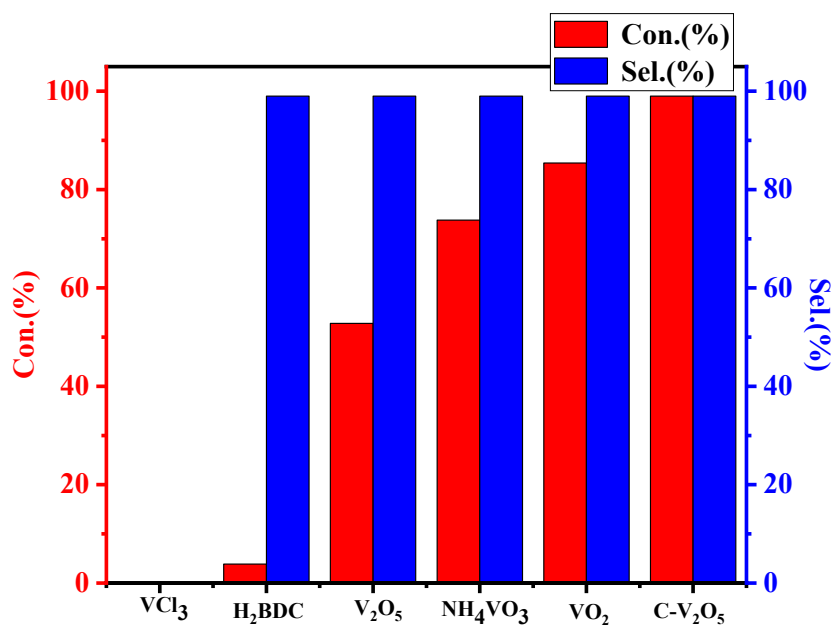

**Fig. S10.** The HMF oxidation is catalyzed by different catalysts.

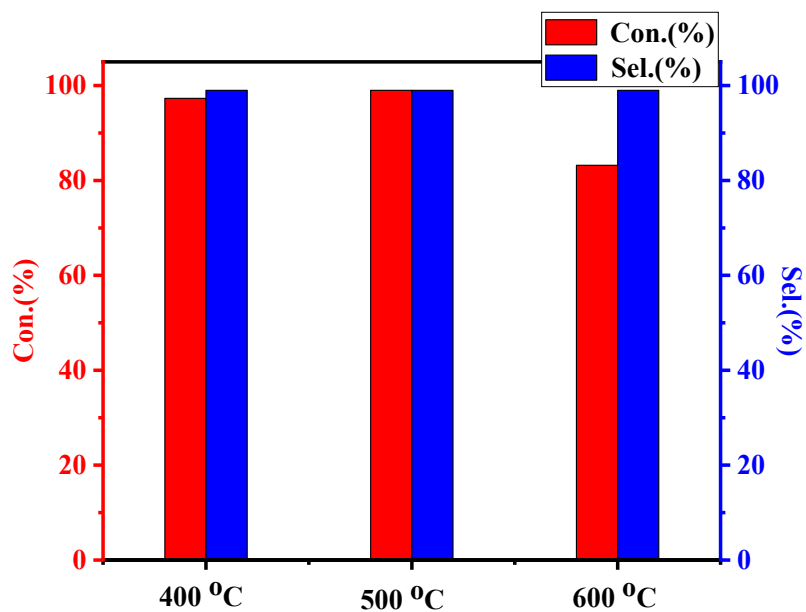

**Fig. S11** The HMF oxidation is catalyzed by Catalysts calcined at different temperatures

**Table S4.** Results of organic element analysis(EA) .

|                                 | N(%) | C(%) | H(%)  |
|---------------------------------|------|------|-------|
| C-V <sub>2</sub> O <sub>5</sub> | 0.05 | 0.23 | 0.101 |

**Table S5.** Analysis of metal elements in reaction solution .

|                                 | metal | Element concentration of test solution C <sub>0</sub> (mg/mL) |
|---------------------------------|-------|---------------------------------------------------------------|
| C-V <sub>2</sub> O <sub>5</sub> | V     | 0.005481                                                      |
